# Supplementary material for: Sex Chromosome Evolution, Heterochiasmy, and Physiological QTL in the Salmonid Brook Charr Salvelinus fontinalis
Source: Oxford University Press journal article supplement (doi:10.1534/g3.117.040915), 2017-06-16

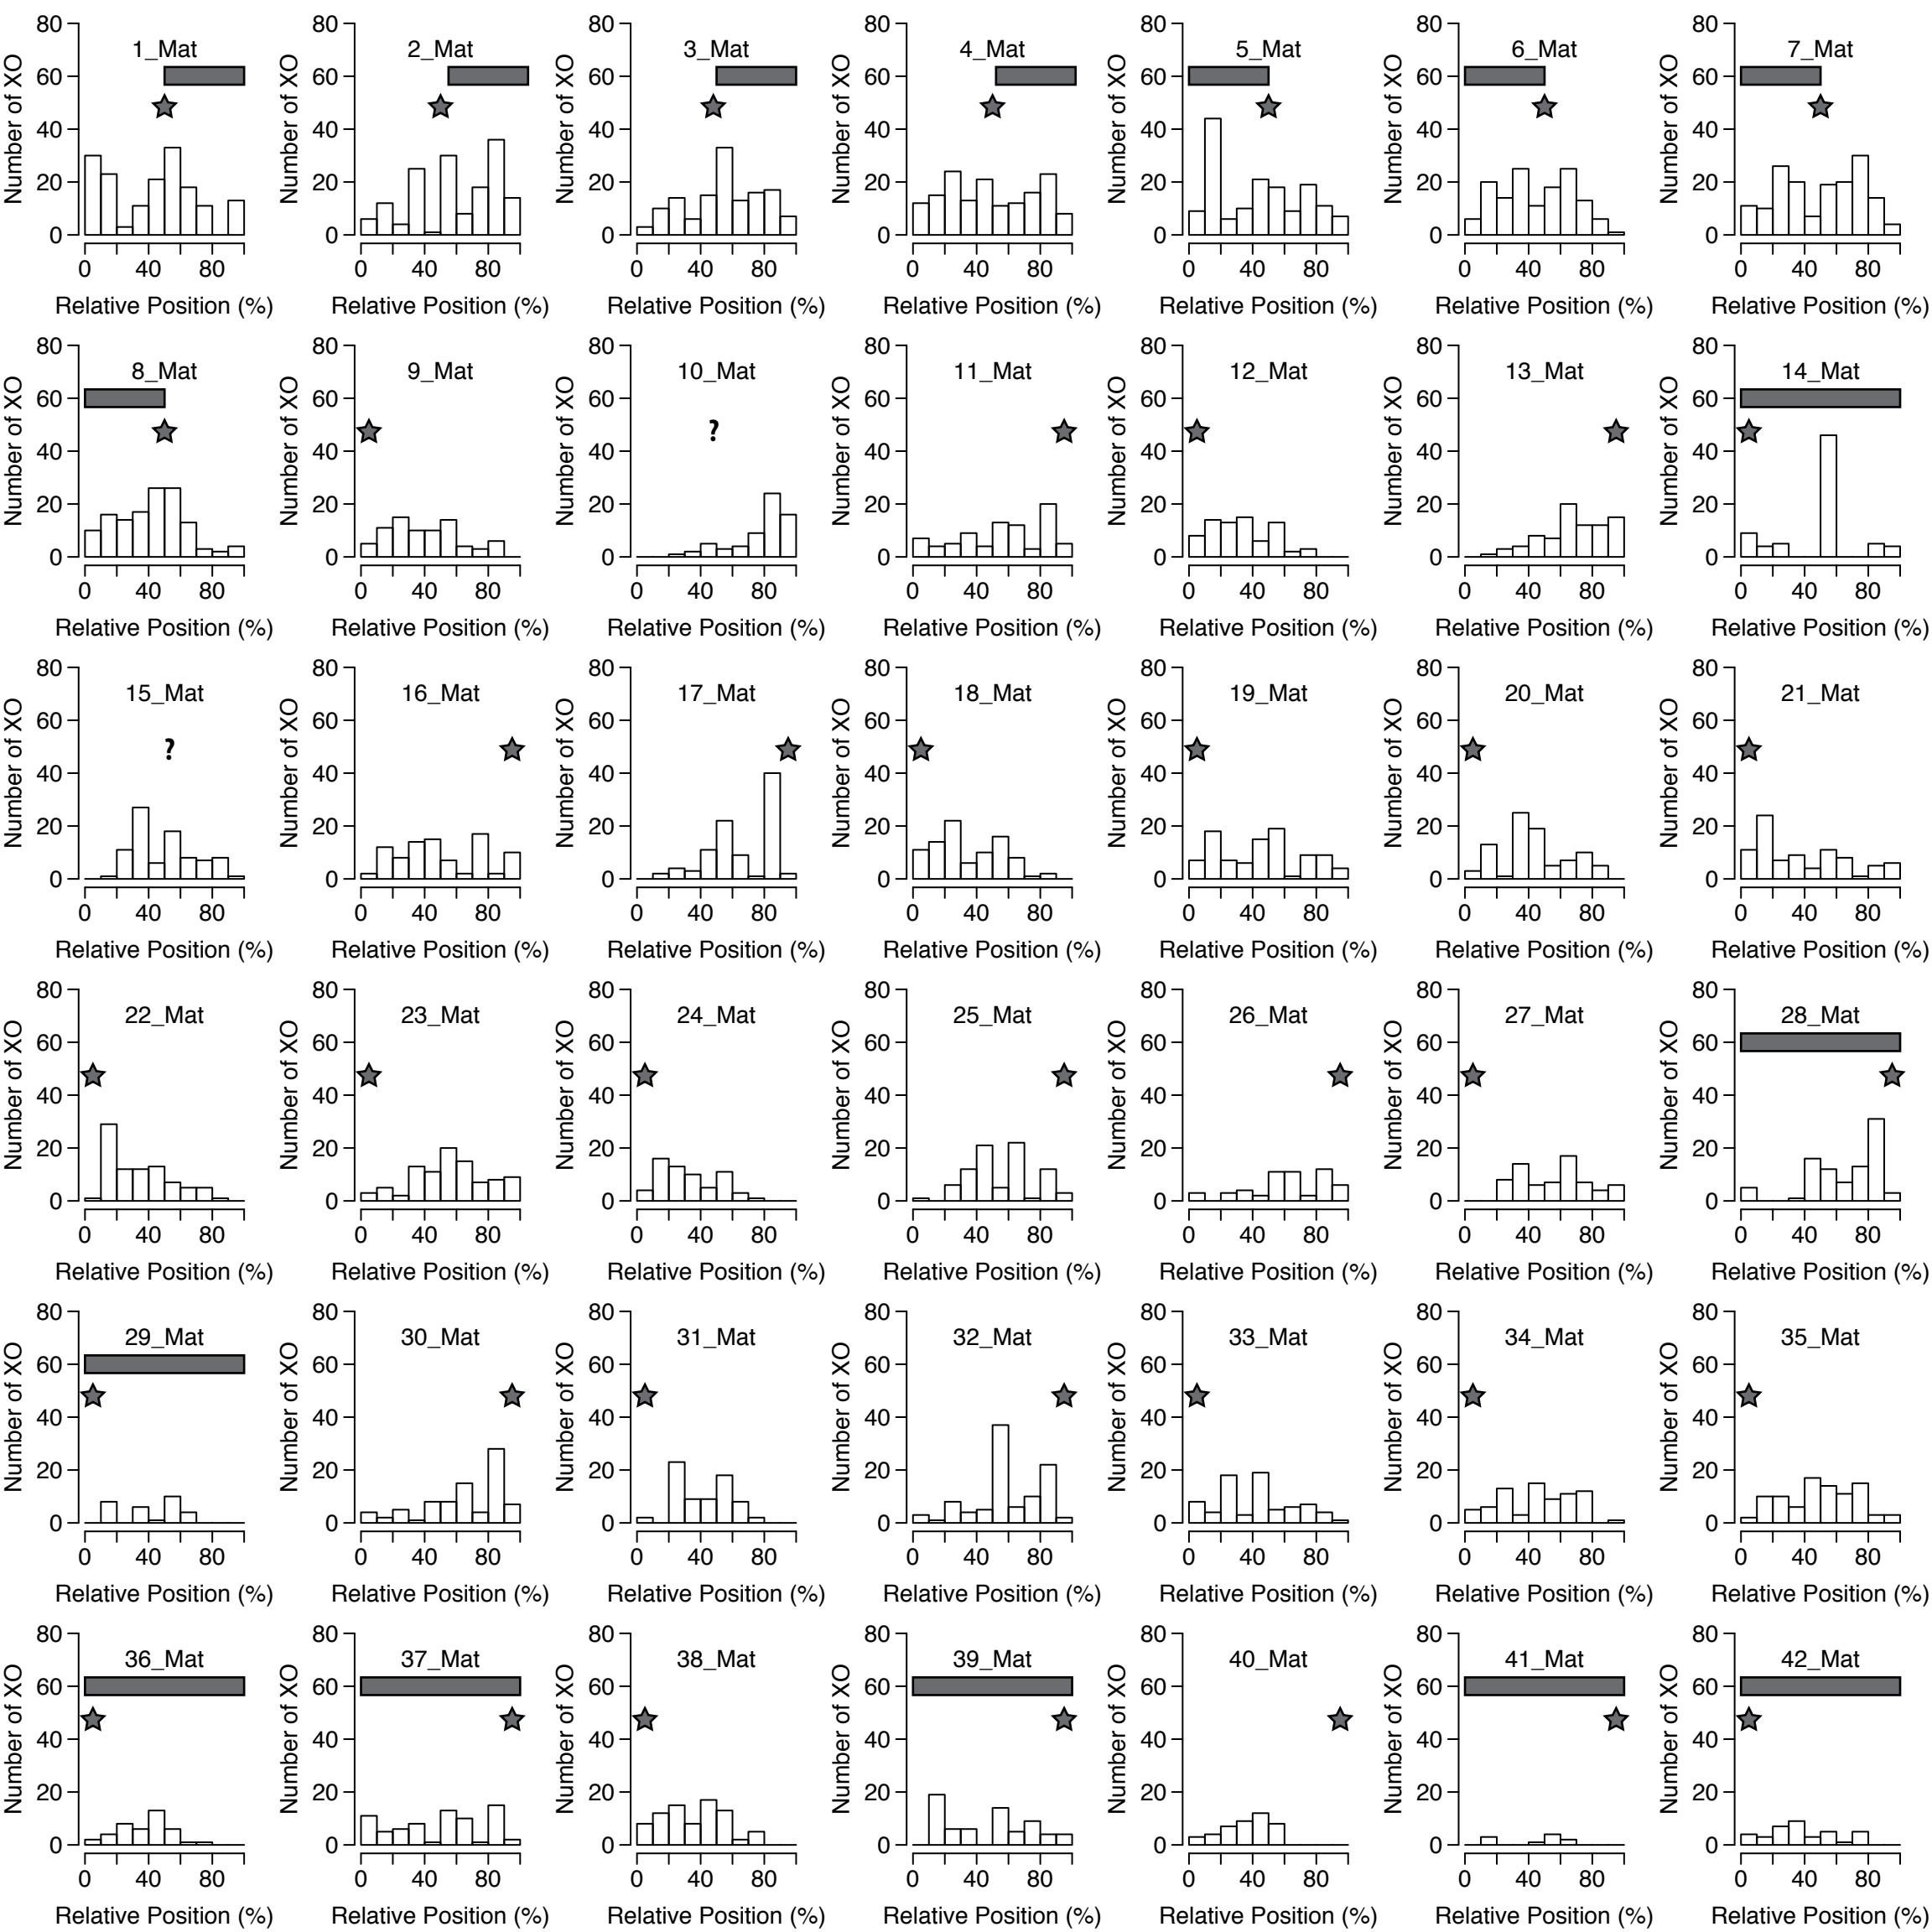

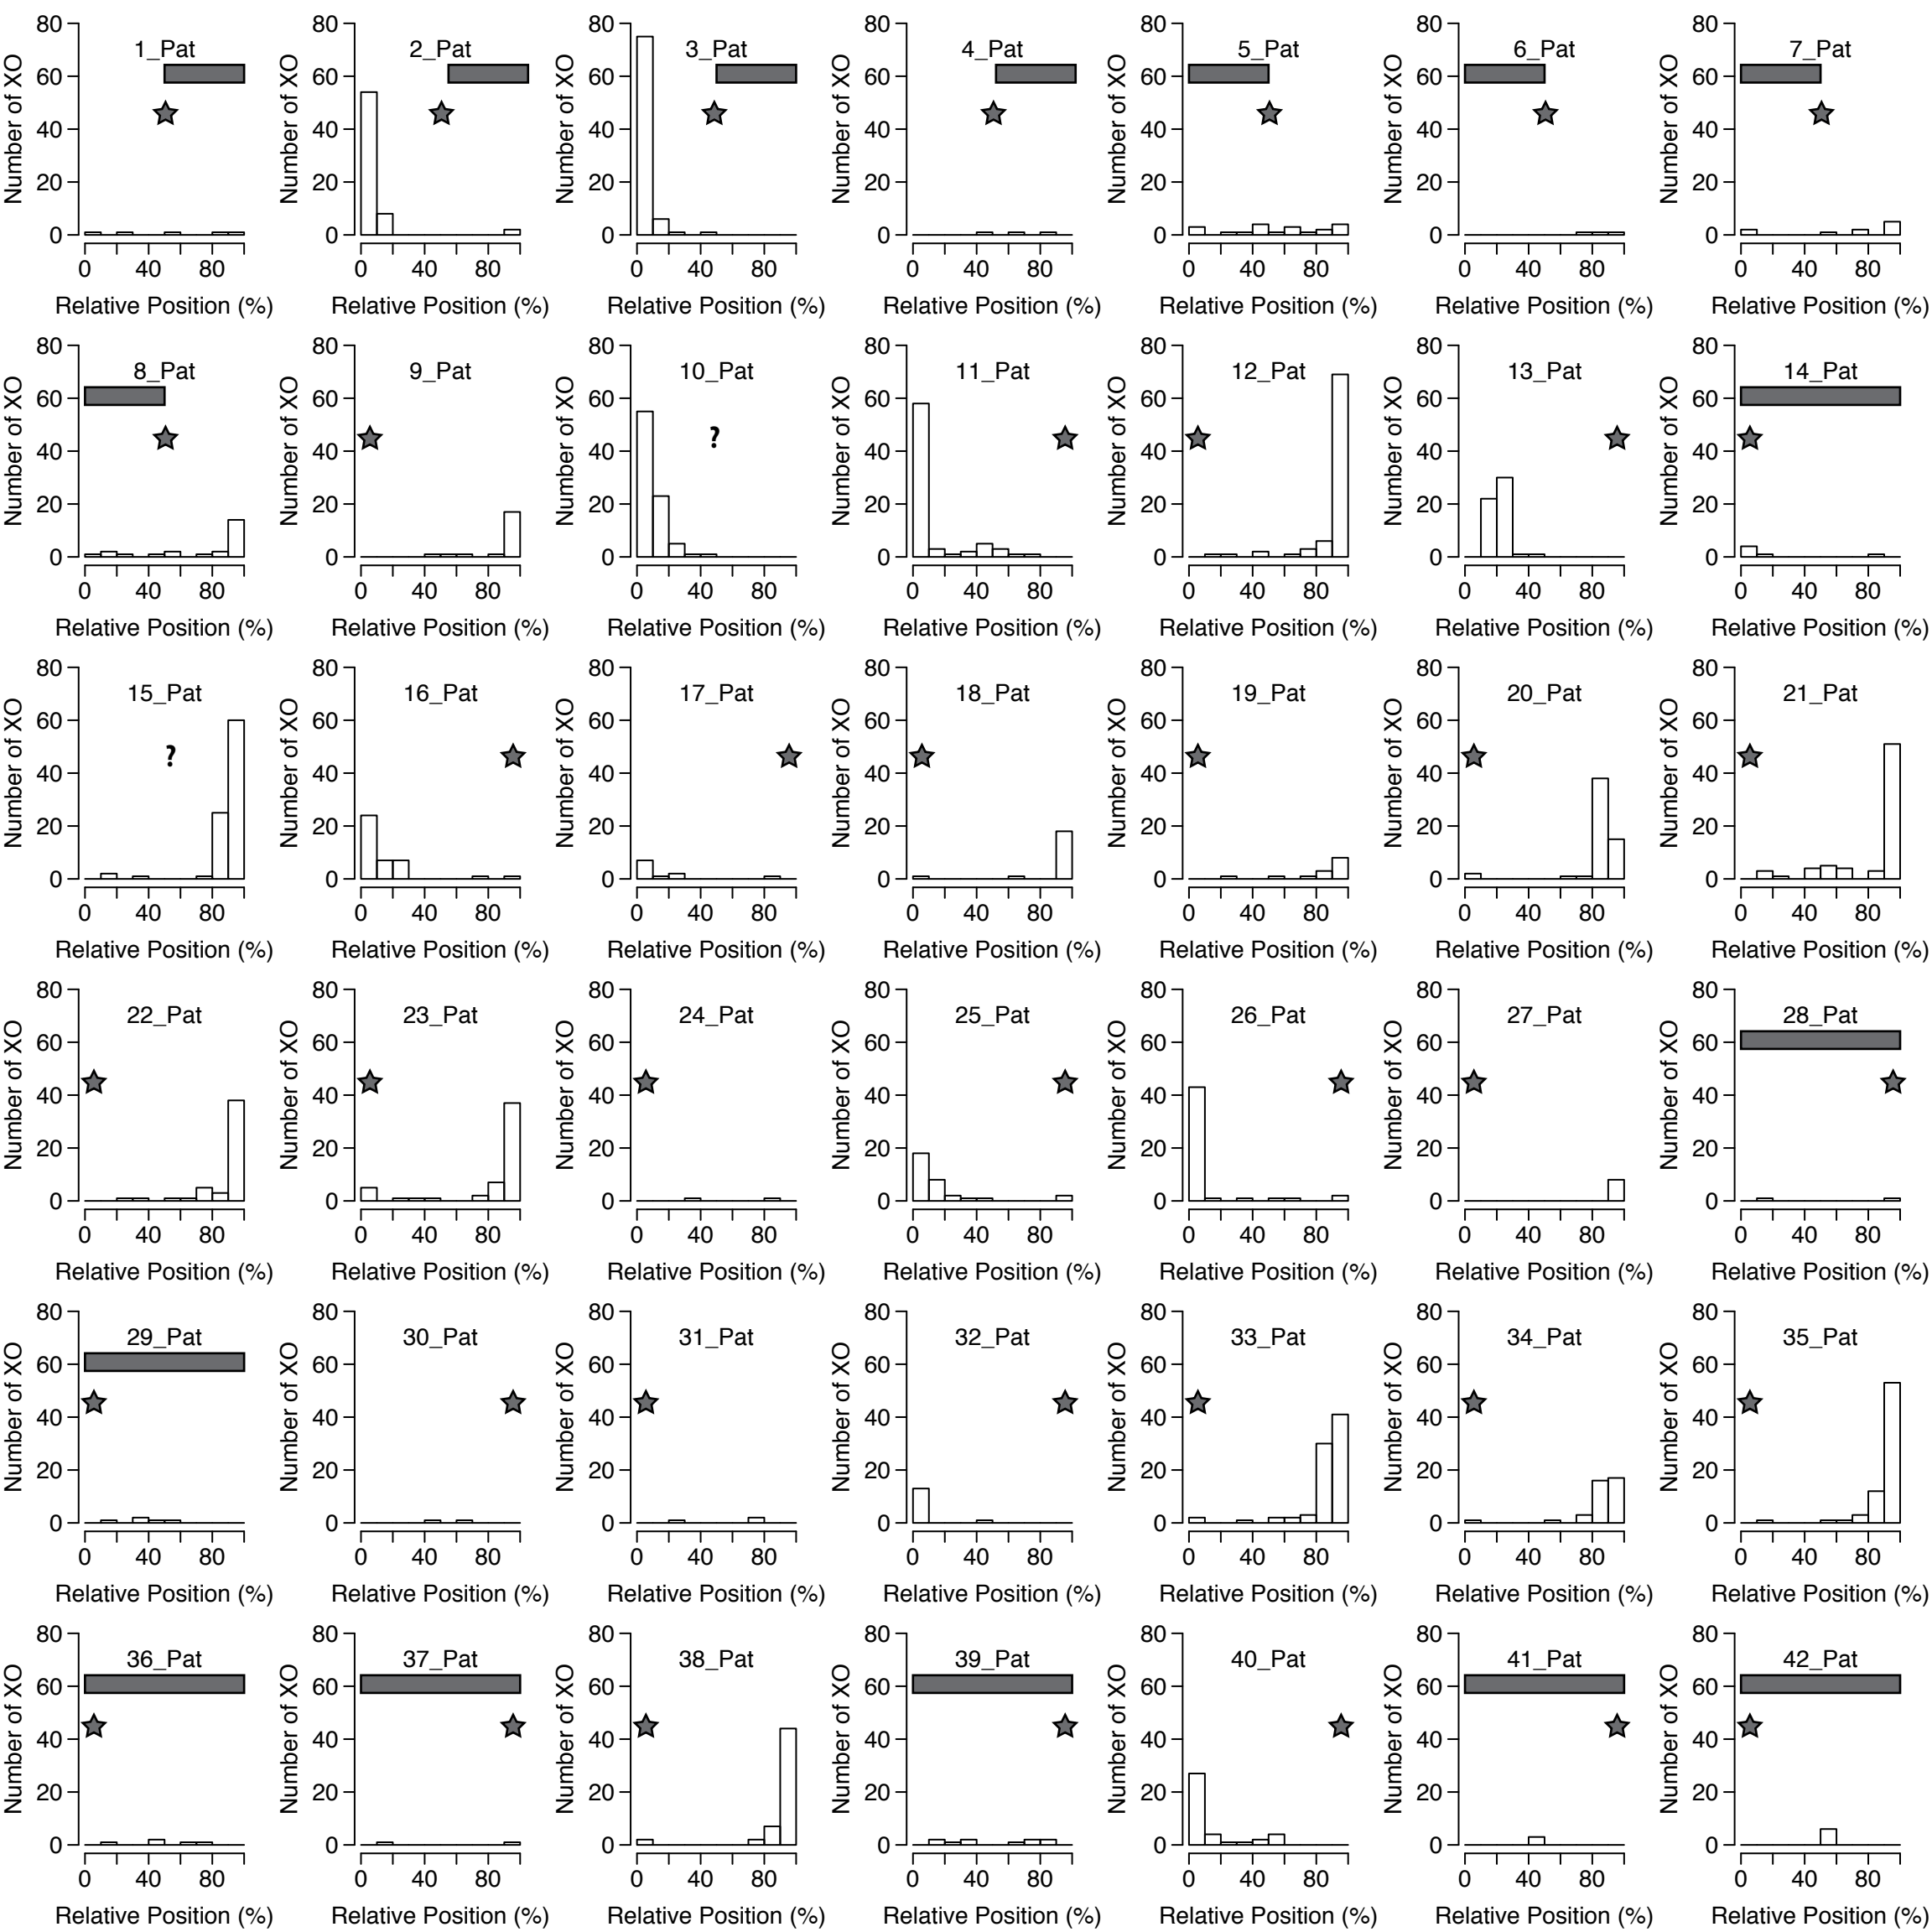

Supplement: 040915_figures1.pdf [file 040915_figures1.pdf]
