# Supplementary material for: Sex Chromosome Evolution, Heterochiasmy, and Physiological QTL in the Salmonid Brook Charr Salvelinus fontinalis
Source: Oxford University Press journal article supplement (doi:10.1534/g3.117.040915), 2017-06-16
Supplement: 040915_tables1.pdf [file 040915_tables1.pdf]

| Phenotype                         | Female Avg | Female Stdev | Female (n) | Male Avg | Male Stdev | Male (n) | Sex as a covariate |
|-----------------------------------|------------|--------------|------------|----------|------------|----------|--------------------|
| Weight (g) at T1                  | 65.1       | 16.3         | 78         | 80.7     | 21.4       | 91       | yes                |
| Weight (g) at T2                  | 131.7      | 26.4         | 78         | 160.4    | 35.7       | 91       | yes                |
| Weight (g) at T3                  | 230.9      | 57.8         | 78         | 272.7    | 60.7       | 91       | yes                |
| SGR (T1-T2)                       | 1.2        | 0.1          | 78         | 1.2      | 0.1        | 89       | no                 |
| SGR (T2-T3)                       | 0.6        | 0.2          | 78         | 0.6      | 0.2        | 89       | no                 |
| SGR (T1-T3)                       | 0.8        | 0.2          | 78         | 0.8      | 0.2        | 91       | no                 |
| Length (cm) at T1                 | 18.5       | 1.5          | 78         | 19.8     | 1.6        | 91       | yes                |
| Length (cm) at T2                 | 22.2       | 1.5          | 78         | 23.8     | 1.6        | 89       | yes                |
| Length (cm) at T3                 | 27.2       | 2.1          | 78         | 28.7     | 1.8        | 91       | yes                |
| Condition factor at T1            | 1.0        | 0.1          | 78         | 1.0      | 0.1        | 91       | no                 |
| Condition factor at T2            | 1.2        | 0.1          | 78         | 1.2      | 0.1        | 87       | no                 |
| Condition factor at T3            | 1.1        | 0.1          | 78         | 1.1      | 0.1        | 91       | no                 |
| Liver weight (g)                  | 3.7        | 1.9          | 78         | 3.3      | 1.7        | 91       | yes                |
| Hepatosomatic index               | 1.7        | 0.8          | 78         | 1.3      | 0.7        | 91       | yes                |
| Hematocrit (% red blood cells)    | 35.4       | 3.6          | 32         | 38.1     | 4.2        | 42       | yes                |
| Change in cortisol (µg/dL plasma) | 8.8        | 5.5          | 45         | 0.5      | 2.7        | 47       | yes                |
| Change in osmolality (mmol/kg)    | 9.0        | 17.2         | 44         | -4.6     | 13.0       | 47       | yes                |
| Change in chloride (mmol/L)       | -1.7       | 7.1          | 45         | -0.8     | 3.9        | 47       | no                 |
| Female egg diameter (mm)          | 4.0        | 0.2          | 42         | NA       | NA         | NA       | sex specific       |
| Male sperm concentration          | NA         | NA           | NA         | 63813    | 17301      | 46       | sex specific       |
| Male sperm diameter (µm)          | NA         | NA           | NA         | 2.9      | 0.0        | 46       | sex specific       |
| Plasma chloride (mmol/L)          | 134.4      | 6.3          | 30         | 133.4    | 4.8        | 41       | yes                |
| Plasma osmolality (mmol/kg)       | 322.9      | 9.2          | 30         | 319.6    | 11.0       | 41       | no                 |
| Plasma glucose (mg/mL plasma)     | 0.7        | 0.2          | 30         | 0.7      | 0.1        | 41       | no                 |
| Hepatic glycogen (mg/g liver)     | 104.6      | 13.2         | 30         | 113.4    | 14.7       | 41       | yes                |
| <i>ghr</i>                        | -4.6       | 1.7          | 30         | -3.7     | 2.1        | 39       | no                 |
| <i>igf1</i>                       | -5.5       | 1.5          | 30         | -4.5     | 2.2        | 39       | yes                |
| <i>igfr1</i>                      | -5.6       | 1.4          | 30         | -4.4     | 1.7        | 39       | yes                |

Note: T1-T3 = time points 1-3 (2009/05, 2009/07, 2009/11); SGR = specific growth rate; *ghr*, *igf1* and *igfr1* are all log2 normalized quantities.
