# Supplementary material for: Sex Chromosome Evolution, Heterochiasmy, and Physiological QTL in the Salmonid Brook Charr Salvelinus fontinalis
Source: G3 (Bethesda). 2017 Jun 16;7(8):2749–62. doi: 10.1534/g3.117.040915 (PMC5555479; doi:10.1534/g3.117.040915)
Supplement: Supplementary file 4 [file 2749TableS2.xlsx]

## Sheet: Table_QTL
	phenotype	sex cov.	chr	pos	95% CI low	95% CI high	Conf. Interval	mname	chr-wide lod	chr-wide p-value	gw-wide p-value	QTL p-value symbol	sex iFx**	Total PVE	Indiv. PVE	Model Pvalue (Ftest)	Rqtl marker type	marker class, phasing, and marker type	SNP	Allele a	Allele b	Allele c	(aa) avg	(ab) avg	(bb) avg	effect size (largest)	(aa) avg.m	(ab) avg.m	(bb) avg.m	effect size (large.m)
Growth	weight.g_T1	Y	4	28.3	16.3	267	16.3-267	7187	4.17	0.0033	ns	*		41.4763	8.148	0.000124	1,2,3,4	<efxeg> {10}; ab/ac	AA:c;AG:a;GG:b	TGCAGACACGGTATTCTGAGTCATCCAACCAATTGGCCAGCGGAAGGCCTAAAGTGCACTTGATTTGCTCTCTGGGACCG	TGCAGACGCGGTATTCTGAGTCATCCAACCAATTGGCCAGCGGAAGGCCTAAAGTGCACTTGATTTGCTCTCTGGGACCG	TGCAGACACGGTATTCTGAGTCATCCAACCAATTGGCCAGCGGAAGGCCTAAAGTGCACTTGATTTGCTCTCTGGGACCA	ab=69.98; aa=62.13; bc=74.36; ac=60.37			13.99	ab=92.1; aa=64.76; bc=82.19; ac=78.59			27.34
	weight.g_T1	Y	5	261	42.5	262	42.5-262	85980	5.83	0	0.004	***			9.109	4.18e-05	7,8	<nnxnp> {-0}; --/ab	C:b;T:a	TGCAGTACTGCTTTCTCTAGCCTCGTTACCATTGGCTGACAGCTGAAGGTTAGCTCAATACTGCCCTCCTGTGGCGAAGG	TGCAGTACTGCTTTCTCTAGCCTCGTTACCATTGGCTGACAGCTGAAGGTTAGCTCAACACTGCCCTCCTGTGGCGAAGG	NA	61.1	72.544	NA	11.444	78.2128	82.0706	NA	3.85777
	weight.g_T1	Y	20	162	158	164	158-164	6352	4.55	0.0017	ns	*			7.266	0.000339	7,8	<nnxnp> {-1}; --/ab	A:b;C:a	TGCAGTCGATGAGACATCTAACCTCTGGATCTCTGGACAATATTAAATCGTGAGTGAAAATATGTGAAGGGTGAAGTTGC	TGCAGTAGATGAGACATCTAACCTCTGGATCTCTGGACAATATTAAATCGTGAGTGAAAATATGTGAAGGGTGAAGTTGC	NA	68.0826	64.6276	NA	-3.45502	87.5026	73.4	NA	-14.1026
	weight.g_T1_sex_covariate	Y						NA							8.611	3.32e-06
	weight.g_T2	Y	4	28.3	16.3	214	16.3-214	7187	4.64	0.0022	ns	*		42.8157	9.547	1.99e-05	1,2,3,4	<efxeg> {10}; ab/ac	AA:c;AG:a;GG:b	TGCAGACACGGTATTCTGAGTCATCCAACCAATTGGCCAGCGGAAGGCCTAAAGTGCACTTGATTTGCTCTCTGGGACCG	TGCAGACGCGGTATTCTGAGTCATCCAACCAATTGGCCAGCGGAAGGCCTAAAGTGCACTTGATTTGCTCTCTGGGACCG	TGCAGACACGGTATTCTGAGTCATCCAACCAATTGGCCAGCGGAAGGCCTAAAGTGCACTTGATTTGCTCTCTGGGACCA	ab=141.32; aa=126.31; bc=145.36; ac=123.31			22.05	ab=181.57; aa=129.51; bc=162.68; ac=161.13			52.06
	weight.g_T2	Y	5	198	38.7	262	38.7-262	125487	4.77	0.0014	ns	*			8.062	0.00011	1,4,10	<hkxhk> {00}; ab/ab	A:a;C:b	TGCAGGTGAGAAGGCTCTGAGCAGTTTGTGAATGCCTCCTGACAGACTGCAACAAATACTCCACACAATGCCTTTCACTA	TGCAGGTGAGAAGGCTCTGAGCAGTTTGTGAATGCCTCCTGACAGACTGCAACAAATACTCCACACAATGCCTTTCCCTA	NA	121.419	132.762	149.323	27.9039	145.262	161.526	175.817	30.5552
	weight.g_T2	Y	20	162	105	175	105-175	6352	4.19	0.004	ns	*			6.15	0.00104	7,8	<nnxnp> {-1}; --/ab	A:b;C:a	TGCAGTCGATGAGACATCTAACCTCTGGATCTCTGGACAATATTAAATCGTGAGTGAAAATATGTGAAGGGTGAAGTTGC	TGCAGTAGATGAGACATCTAACCTCTGGATCTCTGGACAATATTAAATCGTGAGTGAAAATATGTGAAGGGTGAAGTTGC	NA	133.87	131.648	NA	-2.2213	171.192	148.377	NA	-22.8152
	weight.g_T2_sex_covariate	Y						NA							9.518	8.46e-07
	weight.g_T3	Y	20	169	105	175	105-175	60142	5.63	0.0002	0.005	***		32.5061	11.606	1.14e-05	1,4,10	<hkxhk> {00}; ab/ab	A:a;G:b	TGCAGACTTAAAGGACCCATGCTCCCCCATGTAGCTGTGGCGGTCTCGGTCTCTGGCTCTATGTTTGTCTCCAGACATCA	TGCAGACTTAGAGGACCCATGCTCCCCCATGTAGCTGTGGCGGTCTCGGTCTCTGGCTCTATGTTTGTCTCCAGACATCA	NA	208.27	241.545	246.895	38.6254	249.456	292.019	272.981	42.5629
	weight.g_T3	Y	24	79.8	54.9	93.8	54.9-93.8	86217	4.31	0.0024	ns	*			8.358	0.000293	7,8	<nnxnp> {-1}; --/ab	A:a;C:b	TGCAGGACAGAATTCATGGCATGTTAGTCTGTGACTTTGAACAAGGGCTTTGACAATAACATAAAGATAAAGACCAAAGT	TGCAGGACAGAATTCATGGCATGTTAGTCTGTGACTTTGAACAAGGGCTTTGACACTAACATAAAGATAAAGACCAAAGT	NA	214.536	242.926	NA	28.3902	246.231	291.94	NA	45.7097
	weight.g_T3_sex_covariate	Y						NA							6.116	0.00019
	leng.cm_T1	Y	5	261	188	262	188-262	85980	6.26	0.0002	0.003	***		46.6736	7.263	0.000182	7,8	<nnxnp> {-0}; --/ab	C:b;T:a	TGCAGTACTGCTTTCTCTAGCCTCGTTACCATTGGCTGACAGCTGAAGGTTAGCTCAATACTGCCCTCCTGTGGCGAAGG	TGCAGTACTGCTTTCTCTAGCCTCGTTACCATTGGCTGACAGCTGAAGGTTAGCTCAACACTGCCCTCCTGTGGCGAAGG	NA	18.0258	19.128	NA	1.10219	19.6744	19.9147	NA	0.24035
	leng.cm_T1	Y	20	162	158	164	158-164	6352	3.78	0.0085	ns	*			6.444	0.000498	7,8	<nnxnp> {-1}; --/ab	A:b;C:a	TGCAGTCGATGAGACATCTAACCTCTGGATCTCTGGACAATATTAAATCGTGAGTGAAAATATGTGAAGGGTGAAGTTGC	TGCAGTAGATGAGACATCTAACCTCTGGATCTCTGGACAATATTAAATCGTGAGTGAAAATATGTGAAGGGTGAAGTTGC	NA	18.6826	18.4931	NA	-0.18951	20.3368	19.3462	NA	-0.99069
	leng.cm_T1	Y	27	45.1	0	141	0-141	61301	3.79	0.009	ns	*			6.469	0.000483	7,8	<nnxnp> {-1}; --/ab	C:b;T:a	TGCAGTGGTTCCCAACCTTTTTCGGTTAATGTACTACCAAGTACATTTTCCTCTGCCCAGAATACCCCAGGAGTACCCCC	TGCAGTGGTTCCCAACCTTTTTCGGTTAATGTACTACCAAGTACATTTTCCTCTGCCCAGAACACCCCAGGAGTACCCCC	NA	18.3867	18.8857	NA	0.49904	19.9535	19.8222	NA	-0.13127
	leng.cm_T1	Y	34	110	70.6	132	70.6-132	126171	3.88	0.0068	0.042	**	0.072		5.727	0.00121	7,8	<nnxnp> {-1}; --/ab	C:a;T:b	TGCAGGATAAAAATTAATATCTGAGAAATCTGGCAGCTGACCTTCGAAGCCAATCTAAACAATTAGGACAAGTGTTGGTT	TGCAGGATAAAAATTAATATCTGAGAAATCTGGCAGCTGACCTTCGAAGCCAATCTAAACAATTAGGATAAGTGTTGGTT	NA	19.0688	17.5191	NA	-1.5497	20.1714	19.75	NA	-0.42143
	leng.cm_T1_sex_covariate	Y						NA							13.658	2.93e-09
	leng.cm_T2	Y	3	83	18.8	267	18.8-267	90770	3.94	0.0095	ns	*		54.5236	1.98	0.093171	7,8	<nnxnp> {-0}; --/ab	A:b;G:a	TGCAGTTAGCACGCTAATCATCTAGTCTTTGATCCCCTCGCCATTCCTCTTCTCCCTACATGACCATAGCACTGTAGGTA	TGCAGTTAGCACGCTAATCATCTAGTCTTTGATCCCCTCGCCATTCCTCTTCTCCCTACATGACCATAGCACTGTAAGTA	NA	22.3714	22.075	NA	-0.29643	23.5909	23.94	NA	0.34909
	leng.cm_T2	Y	4	115	16.3	215	16.3-215	66075	5.14	0.0005	0.024	**			5.524	0.000627	7,8	<nnxnp> {-1}; --/ab	A:b;G:a	TGCAGTTCTGAAGTAATTATTTTGGTGTAAAAAGGAAGGAACAAGTAGAGAGAGAGGGGTGAGGTAAACTTTGTCAACGT	TGCAGTTCTGAAGTAATTATTTTGGTGTAAAAAGGAAGGAACAAGTAGAGAGAGAGGGGTGAGGTAAACTTTGTCAACAT	NA	21.82	22.697	NA	0.87697	23.6405	23.8368	NA	0.19636
	leng.cm_T2	Y	5	261	184.8	262	184.8-262	85980	7.5	0	0	***			8.185	1.62e-05	7,8	<nnxnp> {-0}; --/ab	C:b;T:a	TGCAGTACTGCTTTCTCTAGCCTCGTTACCATTGGCTGACAGCTGAAGGTTAGCTCAATACTGCCCTCCTGTGGCGAAGG	TGCAGTACTGCTTTCTCTAGCCTCGTTACCATTGGCTGACAGCTGAAGGTTAGCTCAACACTGCCCTCCTGTGGCGAAGG	NA	21.7387	22.848	NA	1.10929	23.6027	23.9088	NA	0.30612
	leng.cm_T2	Y	20	169	98.7	175	98.7-175	60142	3.8	0.0081	ns	*			4.098	0.004668	1,4,10	<hkxhk> {00}; ab/ab	A:a;G:b	TGCAGACTTAAAGGACCCATGCTCCCCCATGTAGCTGTGGCGGTCTCGGTCTCTGGCTCTATGTTTGTCTCCAGACATCA	TGCAGACTTAGAGGACCCATGCTCCCCCATGTAGCTGTGGCGGTCTCGGTCTCTGGCTCTATGTTTGTCTCCAGACATCA	NA	21.7217	22.5323	22.205	0.81052	22.92	24.2333	24.0231	1.31333
	leng.cm_T2	Y	34	112	84.7	132	84.7-132	120757	3.78	0.0094	ns	*			3.134	0.018318	1,4,10	<hkxhk> {11}; ab/ab	A:a;G:b	TGCAGAGTGAAAATCAAACGCTAGCTACAACACGTGGCGGAGGCCAATCTGGAACAAAGTCCCGCTCTCCTTCAAGAGGA	TGCAGAGTGAAAATCAAACGCTGGCTACAACACGTGGCGGAGGCCAATCTGGAACAAAGTCCCGCTCTCCTTCAAGAGGA	NA	22.525	22.4242	21.3944	-0.10076	24.0222	23.5095	24.225	0.20278
	leng.cm_T2_sex_covariate	Y						NA							13.452	4.84e-10
	leng.cm_T3	Y	3	52.9	0	224	0-224	47129	4.05	0.006	ns	*		38.2668	5.706	0.00289	1,4,10	<hkxhk> {11}; ab/ab	A:a;G:b	TGCAGGACATTGGAGTGGAGACGCCACATCCTCCTCCAGCACAGAGTGCCCATGACCCTCCTCCTCTCTGATTGCAGGTT	TGCAGGACATTGGAGTGGAGGCGCCACATCCTCCTCCAGCACAGAGTGCCCATGACCCTCCTCCTCTCTGATTGCAGGTT	NA	28.0308	27.2233	26.281	-0.80744	29.4136	28.9022	27.7739	-0.51147
	leng.cm_T3	Y	20	169	130	175	130-175	60142	5.29	0.0003	0.014	**			10.618	1.43e-05	1,4,10	<hkxhk> {00}; ab/ab	A:a;G:b	TGCAGACTTAAAGGACCCATGCTCCCCCATGTAGCTGTGGCGGTCTCGGTCTCTGGCTCTATGTTTGTCTCCAGACATCA	TGCAGACTTAGAGGACCCATGCTCCCCCATGTAGCTGTGGCGGTCTCGGTCTCTGGCTCTATGTTTGTCTCCAGACATCA	NA	26.413	27.6935	27.63	1.28051	28	29.254	28.8704	1.25405
	leng.cm_T3	Y	24	79.8	48.6	155	48.6-155	86217	3.61	0.0088	ns	*			4.79	0.00794	7,8	<nnxnp> {-1}; --/ab	A:a;C:b	TGCAGGACAGAATTCATGGCATGTTAGTCTGTGACTTTGAACAAGGGCTTTGACAATAACATAAAGATAAAGACCAAAGT	TGCAGGACAGAATTCATGGCATGTTAGTCTGTGACTTTGAACAAGGGCTTTGACACTAACATAAAGATAAAGACCAAAGT	NA	26.85	27.3778	NA	0.52778	27.9231	29.3286	NA	1.40549
	leng.cm_T3_sex_covariate	Y						NA							9.671	1.69e-06
	condit.fact_T1	N	16	89.9	48.4	105	48.4-105	118085	3.86	0.0065	ns	*		9.95205	9.95205	0.000599195	2,3,9	<hkxhk> {01}; ab/ab	C:a;T:b	TGCAGTTGGCTCTTTACAAAGGAGACCTGGGACTCCACACATCCTGCGTGCCCATTCCTGTCATTTCCTCCTGCCATTCA	TGCAGTTGGCTCTTTACAAAGGAGACCTGGGACTCCACACATCCTGCGTGCCCATTCCTGTTATTTCCTCCTGCCATTCA	NA	1.02125	1.01242	1.00235	-0.008832	NA	NA	NA	NA
	condit.fact_T2	N	39	46.9	34.8	83.1	34.8-83.1	39977	3.91	0.0045	ns	*		10.3082	10.3082	0.000539654	1,4,10	<hkxhk> {11}; ab/ab	A:a;G:b	TGCAGGGTTGGGGAGGAGACCCCACTTCCATTCACTGCCCCGTTCACCCCTGAAATCGCACAGAAAGAGGCACAGCACAC	TGCAGGGTTGGGGAGGAGACCCCACTTCCGTTCACTGCCCCGTTCACCCCTGAAATCGCACAGAAAGAGGCACAGCACAC	NA	1.20875	1.2037	1.1751	-0.005051	NA	NA	NA	NA
	condit.fact_T3	N	20	150	116	175	116-175	55565	4.67	0.001	0.04	**	0.031	12.1642	12.1642	8.42894e-05	7,8	<nnxnp> {-0}; --/ab	A:b;G:a	TGCAGGCGGAGTGCTGTCAGTGGAATATAATACCCTTAATAGATGCTTTGTCCTCGTCTGCAAAATGGGATCCTTCTGGC	TGCAGGCGGAGTACTGTCAGTGGAATATAATACCCTTAATAGATGCTTTGTCCTCGTCTGCAAAATGGGATCCTTCTGGC	NA	1.1113	1.15137	NA	0.040071	NA	NA	NA	NA
	SGR_T1.T2	N	9	184	164	206	164-206	33699	4.36	0.0033	ns	*		11.2426	11.2426	0.000215582	7,8	<nnxnp> {-0}; --/ab	A:a;G:b	TGCAGAGTAGCTGTGGAGCAGGCTTGTTTTTCACTCAGTGTTATGAAGGAACAGATTCATTTTAACACCATATCTACACC	TGCAGAGTAGCTGTGGAGCAGGCTTGTTTTTCACTCAGTGTTATGAAGGGACAGATTCATTTTAACACCATATCTACACC	NA	1.20512	1.12901	NA	-0.076108	NA	NA	NA	NA
	SGR_T1.T3	N	36	61.8	1.33	123	1.33-123	41389	5.88	0	0.009			15.1681	15.1681	5.28588e-06	7,8	<nnxnp> {-0}; --/ab	C:b;T:a	TGCAGATTGCGGTTACTACATGCCATGCCCACTACATGCCACACAGTGTGTCACTACAGACTGGGCACACTGCCATTGAG	TGCAGATTGCGGTTACTACATGCCATGCCCACCACATGCCACACAGTGTGTCACTACAGACTGGGCACACTGCCATTGAG	NA	0.791566	0.839155	NA	0.0475886	NA	NA	NA	NA
	SGR_T2.T3	N	3	35.7	18.2	84.8	18.2-84.8	115199	4.4	0.0052	ns	*		25.9901	6.8	0.00312	7,8	<nnxnp> {-1}; --/ab	C:a;T:b	TGCAGTCTGTTGCAGGCCTGGGAAGGGAAGTTGCATAAGCACGGGTCTCTGTCTGCTCTGCTCCTGGGGAGAGAGGGAGG	TGCAGTCTGTTGCAGGCCTGGGAAGGGAAGTTGCATAAGCATGGGTCTCTGTCTGCTCTGCTCCTGGGGAGAGAGGGAGG	NA	0.553021	0.656522	NA	0.103501	NA	NA	NA	NA
	SGR_T2.T3	N	9	139	88.8	189	88.8-189	128240	4.22	0.0042	ns	*			5.344	0.01183	7,8	<nnxnp> {-0}; --/ab	A:a;C:b	TGCAGCAGCAGCCCAGTTTCTTTACTTATTTAAAAGGGACAGAGAAGCTGTACAAAAACAGCTTAACCGCTTTGACTGAG	TGCAGCAGCAGCCCAGTTTCTTTACTTATTTAAAAGGGCCAGAGAAGCTGTACAAAAACAGCTTAACCGCTTTGACTGAG	NA	0.563387	0.604444	NA	0.0410573	NA	NA	NA	NA
	SGR_T2.T3	N	36	31.4	1.33	80.1	1.33-80.1	30493	5.73	0.0003	0.009	***			5.275	0.01261	7,8	<nnxnp> {-1}; --/ab	C:a;T:b	TGCAGCATTATACAGTATTTGGATAAGCTGTTTGAGGCCCATGCCTTCTGCATTGCATGGTTAGTAAATGTTTGTGTGTG	TGCAGCATTATACAGTATTTGGATAAGCTGTTTGAGGCCCATGCCTTCTGTATTGCATGGTTAGTAAATGTTTGTGTGTG	NA	0.6275	0.538965	NA	-0.0885345	NA	NA	NA	NA
	ghr	N	24	138	47.8	153	47.8-153	141355	4.44	0.0041	ns	*		23.8087	23.8087	0.000482062	7,8	<nnxnp> {-1}; --/ab	GA:b;TC:a	TGCAGCTGTGGCTTAGACATACTGTGGGAAAGTCGCCATAAAGTTAGTTGACAGATGATTAAATAAAATGTGTAGACAAC	TGCAGCTGTGGCTTAGACAGACTGTGGGAAAGTCGACATAAAGTTAGTTGACAGATGATTAAATAAAATGTGTAGACAAC	NA	-3.8975	-3.64928	NA	0.248217	NA	NA	NA	NA
	hematocr	Y	4	22.6	16.3	161	16.3-161	105237	4.33	0.0079	ns	*		42.7902	12	0.005437	2,3,9	<hkxhk> {01}; ab/ab	A:a;G:b	TGCAGTGGACAAGATGGAAAATTCAGGACCACTCAATACACACAGCAAATGACAACCTCCGATGTGTATAGGTGTAGGTA	TGCAGTGGACAAGATGGAAAATTCAGGACCACTCAATACACACAGCAAATGACAACCTCCGATGTGTATGGGTGTAGGTA	NA	35.3333	36.2647	33	0.93138	39.5625	37.8824	34.5714	-1.68015
	hematocr	Y	25	139	113	159	113-159	1153	4.39	0.0043	ns	*			12.36	0.00462	7,8	<nnxnp> {-1}; --/ab	CC:a;TT:b	TGCAGCCCCAGCTCATGCTCCAGCTCCATGTGAAATTGTTTCCCGCTAATTGCGCTTCGTTAGATAACAGCACGCTGTCG	TGCAGCCCCAGCTCATGCTCCAGCTCCATGTGAAATTGTTTCTTGCTAATTGCGCTTCGTTAGATAACAGCACGCTGTCG	NA	35.1111	35.6538	NA	0.54274	38.2895	38.1136	NA	-0.17583
	hematocr_sex_covariate	Y						NA							13.91	0.000159
	Weight_liver.g	Y	35	24.5	0	88.6	0-88.6		7.36		0.009	***	0.001
	Weight_liver.g_sex_covar	Y						NA
Reproduction	fem.egg.diam	NA	5	66.8	41.7	185	41.7-185	37572	4.25	0.004	ns	*		38.9518	38.9518	0.000275067	7,8	<nnxnp> {-1}; --/ab	C:a;G:b	TGCAGAAACACATTTCCCTCCACCGATCACACCCCAAACACAGGCCCTTAGGAACCTTATTACATCCTGAAACAAATCAG	TGCAGAAACACATTTGCCTCCACCGATCACACCCCAAACACAGGCCCTTAGGAACCTTATTACATCCTGAAACAAATCAG	NA	3.98167	3.936	NA	-0.045667	NA	NA	NA	NA
	male.sperm.diam	NA	24	47.8	0	59.8	0-59.8	202134	3.85	0.0084	ns	*		32.5868	32.5868	0.000795315	7,8	<nnxnp> {-0}; --/ab	C:a;G:b	TGCAGATGTCACTCAGCCCCTGATGTGATGTTGCCATTGAAACAAAGACAGAAGGGGGGTATAAATCCTCCACCAGCAGC	TGCAGATGTCACTCAGCCCCTGATGTGATGTTGCCATTGAAACAAAGACAGAAGGGGGGTATAAATGCTCCACCAGCAGC	NA	2.86296	2.86158	NA	-0.001384	NA	NA	NA	NA
Stress Response	cort.delta	Y	6	114	108	135	108-135	113752	3.97	0.0067	ns	*		57.5714	9.014	0.000757	7,8	<nnxnp> {-1}; --/ab	G:a;T:b	TGCAGCTGAAGATGTTCACCATCTCTGGTCCCTTTTTGCCACTCCTAGCCAGCTCACCATTTATGTTGTGGAAATATTCA	TGCAGCTGAAGATGTTCACCATCTCTGGTCCCTTTTTGCCACTCCTAGCCATCTCACCATTTATGTTGTGGAAATATTCA	NA	7.42556	9.766	NA	2.34044	0.756296	0.107647	NA	-0.648649
	cort.delta_sex_covariate	Y						NA							43.006	7.11e-15
	chlor.delta	N	38	43.3	25.3	60.9	25.3-60.9	116693	4.09	0.0053	ns	*		18.5169	18.5169	0.000415413	7,8	<nnxnp> {-0}; --/ab	C:a;T:b	TGCAGTCTGGGGATGGCAAATGTTGAATGAATGTGCCGTACCAAATGAGGATTGGAACGGTCCCCCATCTGAACTGTCCA	TGCAGTCTGGGGATGGCAAATGTTGAATGAATGTGCCGTACCAAATGAGGATTGGAACGGTCCCCCATTTGAACTGTCCA	NA	0.309524	-2.58163	NA	-2.89116	NA	NA	NA	NA
	osmo.delta	Y	40	60.3	26.3	82.1	26.3-82.1	52306	3.69	0.0085	ns	*		31.1137	13.97	0.00115	1,4,10	<hkxhk> {11}; ab/ab	A:a;C:b	TGCAGGATAACCCTGCTCTGTGTCTCCGCCTTCTTTAGGCGCAGCAGGGTCACCATCTGACTCCGCCTCTCTCTGCGCTC	TGCAGGCTAACCCTGCTCTGTGTCTCCGCCTTCTTTAGGCGCAGCAGGGTCACCATCTGACTCCGCCTCTCTCTGCGCTC	NA	15.1538	11.7955	-6.55556	-3.35839	-5.4375	-0.854167	-10.5	4.58333
	osmo.delta_sex_covariate	Y						NA							14.63	4.95e-05
	*all are chromosome-wide significant at p < 0.01
	sex iFx**still 1-15 cM offset from the actual QTL position
